# Supplementary material
Source: MDPI journal article supplement (https://www.mdpi.com/1996-1073/16/9/3739)
Supplement: s1 [file s1]

# Supporting information

for

## Optimization of Nanocomposite Films Based on Polyimide–MWCNTs towards Energy Storage Applications

Adriana-Petronela Chiriac<sup>1</sup>, Mariana-Dana Damaceanu<sup>1</sup>, Mihai Asandulesa<sup>1</sup>, Daniela Rusu<sup>2</sup>,

Irina Butnaru<sup>1\*</sup>

<sup>1</sup> *Electroactive Polymers and Plasmachemistry Department, “Petru Poni” Institute of Macromolecular Chemistry, 700487 Iași, Romania*

<sup>2</sup> *Physics of Polymers and Polymeric Materials, “Petru Poni” Institute of Macromolecular Chemistry, 700487 Iași, Romania*

\* Correspondence: [butnaru.irina@icmpp.ro](mailto:butnaru.irina@icmpp.ro)

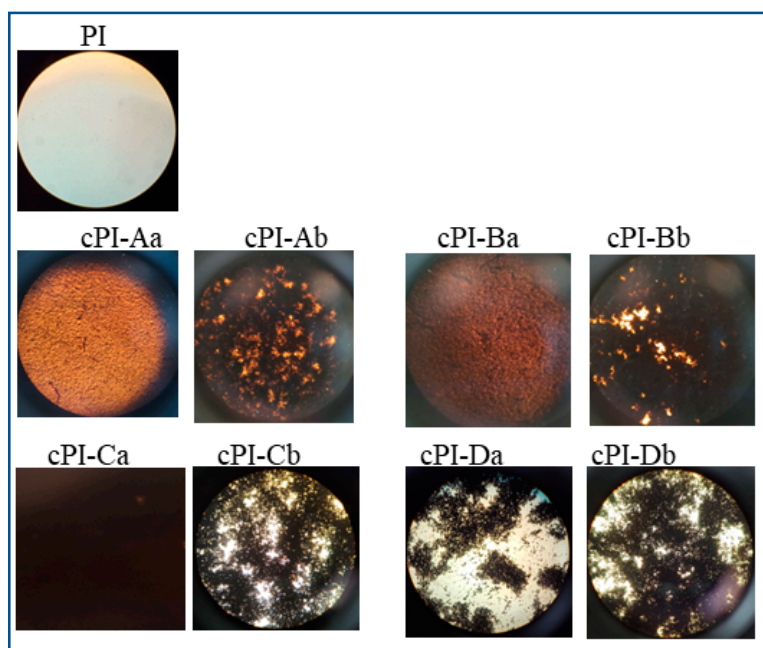

**Figure S1.** Photographs of the polyimide and of all composite films taken by optical microscopy (OM) at a magnification of 40x.

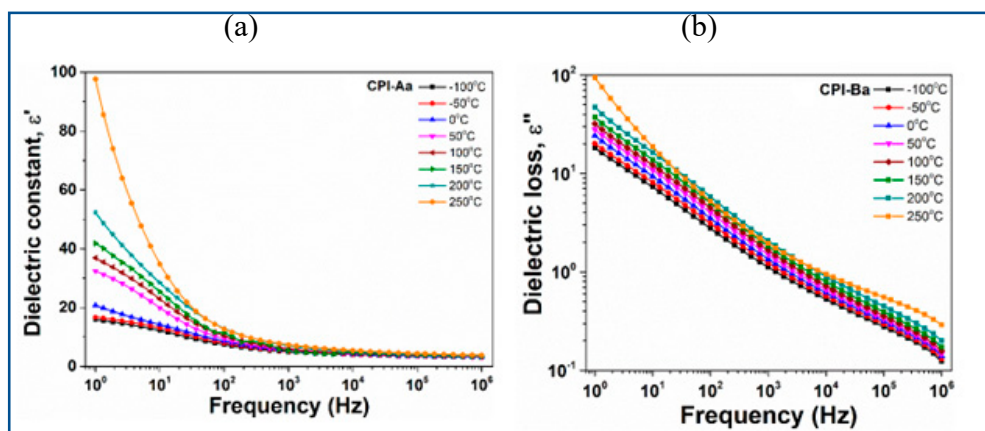

**Figure S2.** The evolution of (a) dielectric constant as function of frequency for **cPI-Aa** nanocomposite at various temperatures and of (b) dielectric loss as function of frequency for **cPI-Ba** nanocomposite at various temperatures.

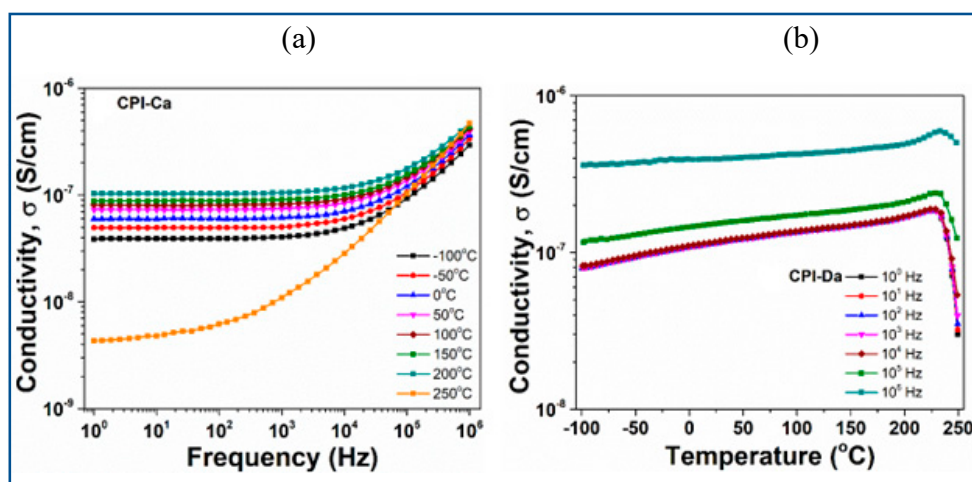

**Figure S3.** The evolution of conductivity as (a) function of frequency for **cPI-Ca** nanocomposite at various temperatures, and (b) function of temperature for **cPI-Da** nanocomposite at various frequencies.
